# Supplementary material for: Molecular Evolution of Tubulins in Diatoms
Source: MDPI journal article supplement (doi:10.3390/ijms23020618), 2022-01-06
Supplement: s1 [file s1]

| ID            | Organism                                                    | Identity,<br>%  | Taxonomy current name                                                    |
|---------------|-------------------------------------------------------------|-----------------|--------------------------------------------------------------------------|
| ALPHA TUBULIN |                                                             |                 |                                                                          |
|               | GENOME DIATOM                                               |                 |                                                                          |
| FcTa          | Fracy1 169390                                               |                 | <i>Fragilariopsis cylindrus</i> (Grunow ex Cleve) Helmcke & Krieger      |
| PmTa1         | Psemu1 235379                                               | 95,58           | <i>Pseudo-nitzschia multiseriis</i> (Hasle) Hasle                        |
| PmTa2         | Psemu1 4917                                                 |                 | <i>Pseudo-nitzschia multiseriis</i>                                      |
| PmtTa         | Psemulti_0108590                                            |                 | <i>Pseudo-nitzschia multistriata</i> (H. Takano) H.Takano                |
| PtTa          | Phatr2 54534                                                |                 | <i>Phaeodactylum tricornutum</i> Bohlin                                  |
| FrTa          | <i>Fragilaria radians</i>  Synedra_Acus 21359               |                 | <i>Fragilaria radians</i> (Kützing) D.M. Williams & Round                |
| TpTa          | Thaps3 29304                                                |                 | <i>Thalassiosira pseudonana</i> Hasle & Heimdal                          |
|               | TRANSCRIPTOME DIATOM                                        |                 |                                                                          |
| ApTa1         | Amphiprora_paludosa_Strain_CCMP125 CAMPEP_0172440494        |                 | <i>Amphiprora paludosa</i> W. Smith Strain CCMP125                       |
| ApTa2         | Amphiprora_paludosa_Strain_CCMP125 CAMPEP_0172442696        |                 | <i>Amphiprora paludosa</i> Strain CCMP125                                |
| ApTa3         | Amphiprora_paludosa_Strain_CCMP125 CAMPEP_0172471188        | 79,69-<br>93,53 | <i>Amphiprora paludosa</i> Strain CCMP125                                |
| AsTa          | Amphiprora-sp CAMPEP_0186488138                             |                 | <i>Amphiprora</i> sp. Ehrenberg                                          |
| AcTa          | Amphora-coffeaformis-CCMP127 CAMPEP_0186540212              |                 | <i>Amphora coffeaformis</i> (C. Agardh) Kützing CCMP127                  |
| AgTa1         | Asterionellopsis_glacialis_Strain_CCMP134 CAMPEP_0199876212 | 55,88           | <i>Asterionellopsis glacialis</i> (Castracane) Round Strain CCMP134      |
| AgTa2         | Asterionellopsis_glacialis_Strain_CCMP134 CAMPEP_0199886380 |                 | <i>Asterionellopsis glacialis</i> (Castracane) Round Strain CCMP134      |
| AtsTa         | Attheya_septentrionalis_Strain_CCMP2084 CAMPEP_0198291474   |                 | <i>Attheya septentrionalis</i> (Østrup) R.M.Crawford Strain CCMP2084     |
| AusTa1a       | Aulacoseira_subarctica_Strain_CCAP_1002/5 CAMPEP_0172418740 | 94,89           | <i>Aulacoseira subarctica</i> (O. Müller) E.Y.Haworth Strain CCAP 1002/5 |
| AusTa1b       | Aulacoseira_subarctica_Strain_CCAP_1002/5 CAMPEP_0172421948 |                 | <i>Aulacoseira subarctica</i> Strain CCAP 1002/5                         |
| CbTa2         | Chaetoceros_debilis_Strain_MM31A-1 CAMPEP_0200885858        | 73,17           | <i>Chaetoceros debilis</i> Cleve Strain MM31A-1                          |
| CbTa1b        | Chaetoceros_debilis_Strain_MM31A-1 CAMPEP_0200897568        |                 | <i>Chaetoceros debilis</i> Cleve Strain MM31A-1                          |
| CdiTa1        | Chaetoceros_dichaeta_Strain_CCMP1751 CAMPEP_0198265246      |                 | <i>Chaetoceros dichaeta</i> Ehrenberg Strain CCMP1751                    |
| CdiTa2        | Chaetoceros_dichaeta_Strain_CCMP1751 CAMPEP_0198275888      | 74,28           | <i>Chaetoceros dichaeta</i> Strain CCMP1751                              |

|        |                                                                          |                 |                                                                                                 |
|--------|--------------------------------------------------------------------------|-----------------|-------------------------------------------------------------------------------------------------|
| CnTa1b | <b>Chaetoceros_neogracile_Strain_CCMP1317 CAMPEP_0200987764</b>          | 72,95           | <i>Chaetoceros neogracile</i> VanLandingham Strain CCMP1317                                     |
| CnTa1a | Chaetoceros_neogracile_Strain_CCMP1317 CAMPEP_0201015148                 |                 | <i>Chaetoceros neogracile</i> Strain CCMP1317                                                   |
| CafTa  | <b>Chaetoceros-affinis-CCMP159 CAMPEP_0187038166</b>                     |                 | <i>Chaetoceros affinis</i> Lauder Strain CCMP159                                                |
| ChTa   | <b>Corethron_hystrix_Strain_308 CAMPEP_0113305702</b>                    |                 | <i>Corethron hystrix</i> Hensen Strain 308                                                      |
| CpTa   | <b>Corethron_pennatum_Strain_L29A3 CAMPEP_0200323448</b>                 |                 | <i>Corethron pennatum</i> (Grunow) Ostenfeld Strain L29A3                                       |
| CauTa  | <b>Craspedostauros_australis_Strain_CCMP3328 CAMPEP_0198134244</b>       |                 | <i>Craspedostauros australis</i> E.J. Cox Strain CCMP3328                                       |
| CmTa   | <b>Cyclotella_meneghiniana_Strain_CCMP_338 CAMPEP_0172265844</b>         |                 | <i>Cyclotella meneghiniana</i> Kützing Strain CCMP 338                                          |
| DfTa   | <b>Dactyliosolen_fragilissimus CAMPEP_0184855548</b>                     |                 | <i>Dactyliosolen fragilissimus</i> (Bergon) Hasle                                               |
| DcTa   | <b>Detonula_confervacea_Strain_CCMP_353 CAMPEP_0172309712</b>            |                 | <i>Detonula confervacea</i> (Cleve) Gran Strain CCMP 353                                        |
| DbTa2  | <b>Ditylum-brightwellii-GSO104 CAMPEP_0193942588</b>                     | 73,11-<br>91,78 | <i>Ditylum brightwellii</i> (T. West) Grunow GSO104                                             |
| DbTa1  | Ditylum-brightwellii-GSO104 CAMPEP_0193943404                            |                 | <i>Ditylum brightwellii</i> GSO104                                                              |
| DbTa1a | Ditylum-brightwellii-GSO104 CAMPEP_0193951558                            |                 | <i>Ditylum brightwellii</i> GSO104                                                              |
| EaTa1  | Eucampia_antarctica_Strain_CCMP1452 CAMPEP_019782462                     |                 | <i>Eucampia antarctica</i> (Castracane) Mangin Strain CCMP1452                                  |
| EaTa2  | <b>Eucampia_antarctica_Strain_CCMP1452 CAMPEP_0197834012</b>             | 67,7            | <i>Eucampia antarctica</i> Strain CCMP1452                                                      |
| EsTa1a | <b>Extubocellulus_spinifer_Strain_CCMP396 CAMPEP_0200463056</b>          | 97,32           | <i>Extubocellulus spinifer</i> (Hargreaves & Guillard) Hasle, Stosch & Syvertsen Strain CCMP396 |
| EsTa1b | Extubocellulus_spinifer_Strain_CCMP396 CAMPEP_0200507072                 |                 | <i>Extubocellulus spinifer</i> Strain CCMP396                                                   |
| FksTa  | <b>Fragilariopsis_kerguelensis_Strain_L2-C3 CAMPEP_0199350668</b>        |                 | <i>Fragilariopsis kerguelensis</i> (O'Meara) Hustedt Strain L2-C3                               |
| FkTa1  | <b>Fragilariopsis-kerguelensis-L26_C5 CAMPEP_0188077452</b>              | 93,08           | <i>Fragilariopsis kerguelensis</i> L26 C5                                                       |
| FkTa2  | Fragilariopsis-kerguelensis-L26_C5 CAMPEP_0188155028                     |                 | <i>Fragilariopsis kerguelensis</i> L26 C5                                                       |
| LdsTa  | <b>Leptocylindrus_danicus_Strain_CCMP1856 CAMPEP_0196809184</b>          |                 | <i>Leptocylindrus danicus</i> Cleve Strain CCMP1856                                             |
| LdTa1a | <b>Leptocylindrus_danicus_var._danicus_Strain_B650 CAMPEP_0116004598</b> | 90,87           | <i>Leptocylindrus danicus</i> var. <i>danicus</i> Strain B650                                   |
| LdTa1b | Leptocylindrus_danicus_var._danicus_Strain_B650 CAMPEP_0116030842        |                 | <i>Leptocylindrus danicus</i> var. <i>danicus</i> Strain B650                                   |
| LpTa   | <b>Licmophora_paradoxa_Strain_CCMP2313 CAMPEP_0202441610</b>             |                 | <i>Licmophora paradoxa</i> (Lyngbye) C. Agardh Strain CCMP2313                                  |
| MpTa   | <b>Minutocellus_polymorphus_Strain_NH13 CAMPEP_0181036982</b>            |                 | <i>Minutocellus polymorphus</i> (Hargraves & Guillard) Hasle, Stosch, & Syvertsen Strain NH13   |
| NpTa   | <b>Nitzschia_punctata_Strain_CCMP561 CAMPEP_0199338790</b>               |                 | <i>Nitzschia punctata</i> (W. Smith) Grunow Strain CCMP561                                      |
| NsTa   | <b>Nitzschia_sp. CAMPEP_0113462244</b>                                   |                 | <i>Nitzschia</i> sp. Hassall                                                                    |
| OsTa   | <b>Odontella_Sinensis_Strain_Grunow_1884 CAMPEP_0183309884</b>           |                 | <i>Odontella sinensis</i> (Greville) Grunow Strain Grunow 1884                                  |

|       |                                                                        |       |                                                                                                                                  |
|-------|------------------------------------------------------------------------|-------|----------------------------------------------------------------------------------------------------------------------------------|
| OdTa  | <b>Odontella CAMPEP_0113546310</b>                                     |       | <i>Odontella</i> sp.                                                                                                             |
| PaTa2 | Proboscia_alata_Strain_PI-D3 CAMPEP_0200137246                         |       | <i>Proboscia alata</i> (Brightwell) Sundström Strain PI-D3                                                                       |
| PaTa1 | <b>Proboscia_alata_Strain_PI-D3 CAMPEP_0200181428</b>                  | 88,47 | <i>Proboscia alata</i> Strain PI-D3                                                                                              |
| ParTa | <b>Pseudo-nitzschia_arenysensis_Strain_B593 CAMPEP_0116120156</b>      |       | <i>Pseudo-nitzschia arenysensis</i> Quijano-Scheggia, Garcés, Lundholm Strain B593                                               |
| PauTa | <b>Pseudo-nitzschia_australis_Strain_10249_10_AB CAMPEP_0199657678</b> |       | <i>Pseudo-nitzschia australis</i> Frenguelli Strain 10249 10 AB                                                                  |
| PdTa2 | Pseudo-nitzschia_delicatissima_Strain_B596 CAMPEP_0116097972           |       | <i>Pseudo-nitzschia delicatissima</i> (Cleve) Heiden Strain B596                                                                 |
| PdTa1 | <b>Pseudo-nitzschia_delicatissima_Strain_B596 CAMPEP_0116105316</b>    | 86,19 | <i>Pseudo-nitzschia delicatissima</i> Strain B596                                                                                |
| PfTa2 | <b>Pseudo-nitzschia_fraudulenta_Strain_WWA7 CAMPEP_0199772816</b>      | 76,67 | <i>Pseudo-nitzschia fraudulenta</i> (Cleve) Hasle Strain WWA7                                                                    |
| PfTa2 | Pseudo-nitzschia_fraudulenta_SPaTatrain_WWA7 CAMPEP_0199773496         |       | <i>Pseudo-nitzschia fraudulenta</i> Strain WWA7                                                                                  |
| PhTa  | <b>Pseudo-nitzschia_heimii_Strain_UNC1101 CAMPEP_0197177854</b>        |       | <i>Pseudo-nitzschia heimii</i> Manguin Strain UNC1101                                                                            |
| PpTa  | <b>Pseudo-nitzschia_pungens_Strain_cf._cingulata CAMPEP_0172375588</b> |       | <i>Pseudo-nitzschia pungens</i> (Grunow ex Cleve) Hasle Strain cf. cingulata                                                     |
| ScTa  | <b>Skeletonema_costatum_Strain_1716 CAMPEP_0113389594</b>              |       | <i>Skeletonema costatum</i> (Greville) Cleve Strain 1716                                                                         |
| SgTa  | <b>Skeletonema_grethae_Strain_CCMP_1804 CAMPEP_0201709312</b>          |       | <i>Skeletonema grethae</i> Strain CCMP 1804                                                                                      |
| SjTa  | <b>Skeletonema_japonicum_Strain_CCMP2506 CAMPEP_0201723980</b>         |       | <i>Skeletonema japonicum</i> Zingone & Sarno Strain CCMP2506                                                                     |
| SdTa  | <b>Skeletonema-dohrnii-SkelB CAMPEP_0192161800</b>                     |       | <i>Skeletonema dohrnii</i> Sarno & Kooistra Strain SkelB                                                                         |
| SmaTa | <b>Skeletonema-marinoi-SkelA CAMPEP_0192255302</b>                     |       | <i>Skeletonema marinoi</i> Sarno & Zingone Strain SkelA                                                                          |
| SmeTa | <b>Skeletonema-menzelii-CCMP793 CAMPEP_0192262610</b>                  |       | <i>Skeletonema menzelii</i> Guillard, Carpenter & Reimann Strain CCMP793                                                         |
| ScsTa | <b>Stauroneis_constricta_Strain_CCMP1120 CAMPEP_0119547256</b>         |       | <i>Stauroneis constricta</i> Ehrenberg Strain CCMP1120 (=Craspedostauros alatus Majewska & M.P. Ashworth 2018 according to [98]) |
| SrTa1 | Synedropsis_recta_cf_Strain_CCMP1620 CAMPEP_0119003500                 |       | <i>Synedropsis recta</i> G.R. Hasle, Medlin & E.E. Syvertsen cf Strain CCMP1620                                                  |
| SrTa2 | <b>Synedropsis_recta_cf_Strain_CCMP1620 CAMPEP_0119013092</b>          | 93,16 | <i>Synedropsis recta</i> Strain CCMP1620                                                                                         |
| TnTa1 | <b>Thalassionema_nitzschoides_Strain_L26-B CAMPEP_0200197008</b>       | 85,81 | <i>Thalassionema nitzschoides</i> (Grunow) Mereschkowsky Strain L26-B                                                            |
| TnTa2 | Thalassionema_nitzschoides_Strain_L26-B CAMPEP_0200199412              |       | <i>Thalassionema nitzschoides</i> Strain L26-B                                                                                   |
| TaTa1 | <b>Thalassiosira_antarctica_Strain_CCMP982 CAMPEP_0200113142</b>       | 93,79 | <i>Thalassiosira antarctica</i> Comber Strain CCMP982                                                                            |
| TaTa2 | Thalassiosira_antarctica_Strain_CCMP982 CAMPEP_0200128994              |       | <i>Thalassiosira antarctica</i> Strain CCMP982                                                                                   |
| TgTa  | <b>Thalassiosira_gravida_Strain_GMp14c1 CAMPEP_0200711806</b>          |       | <i>Thalassiosira gravida</i> Cleve Strain GMp14c1                                                                                |

|                     |                                                                       |                 |                                                                        |
|---------------------|-----------------------------------------------------------------------|-----------------|------------------------------------------------------------------------|
| TmTa                | <b>Thalassiosira_miniscula_Strain_CCMP1093 CAMPEP_0201026216</b>      |                 | <i>Thalassiosira minuscula</i> Krasske Strain CCMP1093                 |
| TpuTa1              | <b>Thalassiosira_punctigera_Strain_Tpunct2005C2 CAMPEP_0172529678</b> | 89,58           | <i>Thalassiosira punctigera</i> (Castracane) Hasle Strain Tpunct2005C2 |
| TpuTa2              | Thalassiosira_punctigera_Strain_Tpunct2005C2 CAMPEP_0172572836        |                 | <i>Thalassiosira punctigera</i> Strain Tpunct2005C2                    |
| ToTa                | <b>Thalassiosira-oceanica-CCMP1005 CAMPEP_0192906026</b>              |                 | <i>Thalassiosira oceanica</i> Hasle Strain CCMP1005                    |
| TrTa                | <b>Thalassiosira-rotula-GSO102 CAMPEP_0193004208</b>                  |                 | <i>Thalassiosira rotula</i> Meunier Strain GSO102                      |
| TxaTa1              | <b>Thalassiothrix_antarctica_Strain_L6-D1 CAMPEP_0200963378</b>       | 92,27           | <i>Thalassiothrix antarctica</i> Schimper ex Karsten Strain L6-D1      |
| TxaTa2              | Thalassiothrix_antarctica_Strain_L6-D1 CAMPEP_0200980512              |                 | <i>Thalassiothrix antarctica</i> Strain L6-D1                          |
| TdTa1               | Triceratium_dubium_Strain_CCMP147 CAMPEP_0197433116                   |                 | <i>Triceratium dubium</i> Brightwell Strain CCMP147                    |
| TdTa2a              | Triceratium_dubium_Strain_CCMP147 CAMPEP_0197465128                   |                 | <i>Triceratium dubium</i> Strain CCMP147                               |
| TdTa2b              | <b>Triceratium_dubium_Strain_CCMP147 CAMPEP_0197466340</b>            | 79,91-<br>90,22 | <i>Triceratium dubium</i> Strain CCMP147                               |
|                     | <b>GENOME out group:</b>                                              |                 |                                                                        |
| HsTa1a              | NP_001257328                                                          |                 | <i>Homo sapiens</i> Linnaeus                                           |
| HsTa1b              | NP_006073.2                                                           | 99.5            | <i>Homo sapiens</i>                                                    |
| HsTa1c              | NP_116093.1                                                           | 98              | <i>Homo sapiens</i>                                                    |
| HsTa4a              | NP_005991.1                                                           |                 | <i>Homo sapiens</i>                                                    |
| HsTa3d              | NP_525125.1                                                           | 99.7            | <i>Homo sapiens</i>                                                    |
| HsTa3c              | NP_005992.1                                                           |                 | <i>Homo sapiens</i>                                                    |
| HsTa3e              | NP_997195.2                                                           | 98.6            | <i>Homo sapiens</i>                                                    |
| HsTa8               | NP_061816.1                                                           |                 | <i>Homo sapiens</i>                                                    |
| HsTaL3              | NP_079079.1                                                           |                 | <i>Homo sapiens</i>                                                    |
| AtTa1               | NP_176654.1                                                           |                 | <i>Arabidopsis thaliana</i> (L.) Heynh                                 |
| AtTa2               | NP_171974.1                                                           | 88.6            | <i>Arabidopsis thaliana</i>                                            |
| AtTa3               | NP_197478.1                                                           | 91.7            | <i>Arabidopsis thaliana</i>                                            |
| AtTa6               | NP_193232.1                                                           | 88.4            | <i>Arabidopsis thaliana</i>                                            |
| <b>BETA TUBULIN</b> |                                                                       |                 |                                                                        |
|                     | <b>GENOME DIATOM</b>                                                  |                 |                                                                        |
| FcTb1               | <b>Fracy1 275160</b>                                                  | 90,83           | <i>Fragilariopsis cylindrus</i>                                        |
| FcTb2               | Fracy1 274017                                                         |                 | <i>Fragilariopsis cylindrus</i>                                        |
| PmTb                | <b>Psemu1 198602</b>                                                  |                 | <i>Pseudo-nitzschia multiseriis</i>                                    |
| PtTb                | <b>Phatr2 21122</b>                                                   |                 | <i>Phaeodactylum tricornutum</i>                                       |

|        |                                                                    |                 |                                                             |
|--------|--------------------------------------------------------------------|-----------------|-------------------------------------------------------------|
| FrTb   | <b>Fragilaria radians  Synedra_Acus 1562</b>                       |                 | <i>Fragilaria radians</i>                                   |
| TpTb1a | Thaps3 31569                                                       |                 | <i>Thalassiosira pseudonana</i>                             |
| TpTb2  | Thaps3 8069                                                        | 78,33-<br>97,18 | <i>Thalassiosira pseudonana</i>                             |
| TpTb1b | Thaps3 210                                                         |                 | <i>Thalassiosira pseudonana</i>                             |
|        | <b>TRANSCRIPTOME DIATOM</b>                                        |                 |                                                             |
| ApTb   | <b>Amphiprora_paludosa_Strain_CCMP125 CAMPEP_0172472678</b>        |                 | <i>Amphiprora paludosa</i> Strain CCMP125                   |
| AcTb   | <b>Amphora-coffeaformis-CCMP127 CAMPEP_0186542886</b>              |                 | <i>Amphora coffeaformis</i> Strain CCMP127                  |
| AgTb   | <b>Asterionellopsis_glacialis_Strain_CCMP134 CAMPEP_0199870976</b> |                 | <i>Asterionellopsis glacialis</i> Strain CCMP134            |
| ArTb   | <b>Astrosyne_radiata_Strain_13vi08-1A CAMPEP_0116850756</b>        |                 | <i>Astrosyne radiata</i> Ashworth & Lobban Strain 13vi08-1A |
| AtsTb  | <b>Attheya_septentrionalis_Strain_CCMP2084 CAMPEP_0198305504</b>   |                 | <i>Attheya septentrionalis</i> Strain CCMP2084              |
| AusTb  | <b>Aulacoseira_subarctica_Strain_CCAP_1002/5 CAMPEP_0172423308</b> |                 | <i>Aulacoseira subarctica</i> Strain CCAP 1002/5            |
| CdTb1  | Chaetoceros_debilis_Strain_MM31A-1 CAMPEP_0200898360               |                 | <i>Chaetoceros debilis</i> Strain MM31A-1                   |
| CdTb2  | Chaetoceros_debilis_Strain_MM31A-1 CAMPEP_0200898934               | 82,02           | <i>Chaetoceros debilis</i> Strain MM31A-1                   |
| CdTb   | Chaetoceros_dichaeta_Strain_CCMP1751 CAMPEP_0198252006             |                 | <i>Chaetoceros dichaeta</i> Strain CCMP1751                 |
| CnTb   | Chaetoceros_neogracile_Strain_CCMP1317 CAMPEP_0201001636           |                 | <i>Chaetoceros neogracile</i> Strain CCMP1317               |
| CsTb   | Chaetoceros_sp._Strain_GSL56 CAMPEP_0176481438                     |                 | <i>Chaetoceros</i> sp. Ehrenberg Strain GSL56               |
| CafTb  | Chaetoceros-affinis-CCMP159 CAMPEP_0187034516                      |                 | <i>Chaetoceros affinis</i> Strain CCMP159                   |
| CcTb   | Chaetoceros-curvisetus CAMPEP_0187068936                           |                 | <i>Chaetoceros curvisetus</i> Cleve                         |
| ChTb   | Corethron_hystrix_Strain_308 CAMPEP_0113310782                     |                 | <i>Corethron hystrix</i> Strain 308                         |
| CpTb1  | Corethron_pennatum_Strain_L29A3 CAMPEP_0200307738                  | 99,32           | <i>Corethron pennatum</i> Strain L29A3                      |
| CpTb2  | Corethron_pennatum_Strain_L29A3 CAMPEP_0200330498                  |                 | <i>Corethron pennatum</i> Strain L29A3                      |
| CwTb   | Coscinodiscus_wailesii_Strain_CCMP2513 CAMPEP_0172483548           |                 | <i>Coscinodiscus wailesii</i> Gran & Angst Strain CCMP2513  |
| CmTb1  | Cyclotella_meneghiniana_Strain_CCMP_338 CAMPEP_0172271610          |                 | <i>Cyclotella meneghiniana</i> Strain CCMP 338              |
| CmTb2  | Cyclotella_meneghiniana_Strain_CCMP_338 CAMPEP_0172279094          | 79,23           | <i>Cyclotella meneghiniana</i> Strain CCMP 338              |
| DfTb   | Dactyliosolen_fragilissimus CAMPEP_0184871524                      |                 | <i>Dactyliosolen fragilissimus</i>                          |
| DbTb   | Ditylum-brightwellii-GSO104 CAMPEP_0193949392                      |                 | <i>Ditylum brightwellii</i> GSO104                          |
| EmTb   | Entomoneis_sp._Strain_CCMP2396 CAMPEP_0198143082                   |                 | <i>Entomoneis</i> Ehrenberg sp. Strain CCMP2396             |
| EaTb   | Eucampia_antarctica_Strain_CCMP1452 CAMPEP_0197831824              |                 | <i>Eucampia antarctica</i> Strain CCMP1452                  |
| EsTb   | Extubocellulus_spinifer_Strain_CCMP396 CAMPEP_0200503696           |                 | <i>Extubocellulus spinifer</i> Strain CCMP396               |
| FksTb  | Fragilariopsis_kerguelensis_Strain_L2-C3 CAMPEP_0199371270         |                 | <i>Fragilariopsis kerguelensis</i> Strain L2-C3             |
| FkTb   | Fragilariopsis-kerguelensis-L26_C5 CAMPEP_0188152368               |                 | <i>Fragilariopsis kerguelensis</i> L26 C5                   |



|        |                                                                           |       |                                                                                      |
|--------|---------------------------------------------------------------------------|-------|--------------------------------------------------------------------------------------|
| GoTb   | <b>Grammatophora_oceanica_Strain_CCMP_410 CAMPEP_0194047338</b>           |       | <i>Grammatophora oceanica</i> Ehrenberg Strain CCMP 410                              |
| LdsTb  | <b>Leptocylinndrus_danicus_Strain_CCMP1856 CAMPEP_0196803170</b>          |       | <i>Leptocylinndrus danicus</i> Strain CCMP1856                                       |
| LdaTb2 | Leptocylinndrus_danicus_var._apora_Strain_B651 CAMPEP_0116056322          |       | <i>Leptocylinndrus danicus</i> var. <i>apora</i> Strain B651                         |
| LdaTb1 | <b>Leptocylinndrus_danicus_var._apora_Strain_B651 CAMPEP_0116057550</b>   | 81,08 | <i>Leptocylinndrus danicus</i> var. <i>apora</i> Strain B651                         |
| LdTb1  | <b>Leptocylinndrus_danicus_var._danicus_Strain_B650 CAMPEP_0116014292</b> | 82,21 | <i>Leptocylinndrus danicus</i> var. <i>danicus</i> Strain B650                       |
| LdTb2  | Leptocylinndrus_danicus_var._danicus_Strain_B650 CAMPEP_0116018536        |       | <i>Leptocylinndrus danicus</i> var. <i>danicus</i> Strain B650                       |
| LpTb   | <b>Licmophora_paradoxa_Strain_CCMP2313 CAMPEP_0202476408</b>              |       | <i>Licmophora paradoxa</i> Strain CCMP2313                                           |
| MpTb   | <b>Minutocellus_polymorphus_Strain_RCC2270 CAMPEP_0185825564</b>          |       | <i>Minutocellus polymorphus</i> Strain NH13                                          |
| NsTb   | <b>Nitzschia_sp. CAMPEP_0113488770</b>                                    |       | <i>Nitzschia</i> sp.                                                                 |
| OsTb1a | Odontella_sinensis_Strain_Grunow_1884 CAMPEP_0183298264                   |       | <i>Odontella sinensis</i> Strain Grunow 1884                                         |
| OsTb1b | <b>Odontella_sinensis_Strain_Grunow_1884 CAMPEP_0183307214</b>            | 94,42 | <i>Odontella sinensis</i> Strain Grunow 1884                                         |
| OdTb1a | <b>Odontella CAMPEP_0113540332</b>                                        | 90,79 | <i>Odontella</i> sp.                                                                 |
| OdTb1b | Odontella CAMPEP_0113570490                                               |       | <i>Odontella</i> sp.                                                                 |
| PaTb2  | <b>Proboscia_alata_Strain_PI-D3 CAMPEP_0200146880</b>                     | 84,62 | <i>Proboscia alata</i> Strain PI-D3                                                  |
| PaTb1  | Proboscia_alata_Strain_PI-D3 CAMPEP_0200161076                            |       | <i>Proboscia alata</i> Strain PI-D3                                                  |
| PiTb   | <b>Proboscia_inermis_Strain_CCAP1064/1 CAMPEP_0171295370</b>              |       | <i>Proboscia inermis</i> (F. Castracane) R.W. Jordan & R. Ligowski Strain CCAP1064/1 |
| PauTb  | <b>Pseudo-nitzschia_australis_Strain_10249_10_AB CAMPEP_0199673840</b>    |       | <i>Pseudo-nitzschia australis</i> Strain 10249 10 AB                                 |
| PdTb1  | Pseudo-nitzschia_delicatissima_Strain_B596 CAMPEP_0116093924              |       | <i>Pseudo-nitzschia delicatissima</i> Strain B596                                    |
| PdTb2  | <b>Pseudo-nitzschia_delicatissima_Strain_B596 CAMPEP_0116101620</b>       | 81,18 | <i>Pseudo-nitzschia delicatissima</i> Strain B596                                    |
| PfTb   | <b>Pseudo-nitzschia_fraudulenta_Strain_WWA7 CAMPEP_0199762250</b>         |       | <i>Pseudo-nitzschia fraudulenta</i> Strain WWA7                                      |
| PhTb1  | <b>Pseudo-nitzschia_heimii_Strain_UNC1101 CAMPEP_0197185050</b>           | 82,77 | <i>Pseudo-nitzschia heimii</i> Strain UNC1101                                        |
| PhTb2  | Pseudo-nitzschia_heimii_Strain_UNC1101 CAMPEP_0197196530                  |       | <i>Pseudo-nitzschia heimii</i> Strain UNC1101                                        |
| PpTb   | <b>Pseudo-nitzschia_pungens_Strain_cf._cingulata CAMPEP_0172373056</b>    |       | <i>Pseudo-nitzschia pungens</i> Strain cf. <i>cingulata</i>                          |
| SgTb   | <b>Skeletonema_grethae_Strain_CCMP_1804 CAMPEP_0201685470</b>             |       | <i>Skeletonema grethae</i> Strain CCMP 1804                                          |
| SmeTb  | <b>Skeletonema-menzelii-CCMP793 CAMPEP_0192278154</b>                     |       | <i>Skeletonema menzelii</i> Strain CCMP793                                           |
| ScTb2  | <b>Staurosira_complex_sp._Strain_CCMP2646 CAMPEP_0202493888</b>           | 77,51 | <i>Staurosira</i> Ehrenberg complex sp. Strain CCMP2646                              |
| ScTb1  | Staurosira_complex_sp._Strain_CCMP2646 CAMPEP_0202493888                  |       | <i>Staurosira</i> complex sp. Strain CCMP2646                                        |
| SrTb   | <b>Synedropsis_recta_cf_Strain_CCMP1620 CAMPEP_0119015808</b>             |       | <i>Synedropsis recta</i> Strain CCMP1620                                             |
| TnTb   | <b>Thalassionema_nitzschoides_Strain_L26-B CAMPEP_0200198590</b>          |       | <i>Thalassionema nitzschoides</i> Strain L26-B                                       |
| TaTb   | <b>Thalassiosira_antarctica_Strain_CCMP982 CAMPEP_0200113766</b>          |       | <i>Thalassiosira antarctica</i> Strain CCMP982                                       |
| TgTb2  | <b>Thalassiosira_gravida_Strain_GMp14c1 CAMPEP_0200705720</b>             | 79,46 | <i>Thalassiosira gravida</i> Strain GMp14c1                                          |

|         |                                                           |             |                                                                         |
|---------|-----------------------------------------------------------|-------------|-------------------------------------------------------------------------|
| TgTb1   | Thalassiosira_gravida_Strain_GMp14c1 CAMPEP_0200730680    |             | Thalassiosira gravida Strain GMp14c1                                    |
| TmTb    | Thalassiosira_miniscula_Strain_CCMP1093 CAMPEP_0201049656 |             | Thalassiosira miniscula Strain CCMP1093                                 |
| ToTb    | Thalassiosira-oceanica-CCMP1005 CAMPEP_0192888186         |             | Thalassiosira oceanica Strain CCMP1005                                  |
| TrcTb1  | Thalassiosira-rotula-CCMP3096 CAMPEP_0192946304           | 79,91       | Thalassiosira rotula Strain CCMP3096                                    |
| TrcTb2  | Thalassiosira-rotula-CCMP3096 CAMPEP_0192984804           |             | Thalassiosira rotula Strain CCMP3096                                    |
| TrTb    | Thalassiosira-rotula-GSO102 CAMPEP_0192989516             |             | Thalassiosira rotula Strain GSO102                                      |
| TwTb    | Thalassiosira-weissflogii-CCMP1010 CAMPEP_0193033132      |             | Thalassiosira weissflogii (Grunow) G.A. Fryxell & Hasle Strain CCMP1010 |
| TwcTb   | Thalassiosira-weissflogii-CCMP1336 CAMPEP_0193074566      |             | Thalassiosira weissflogii Strain CCMP1336                               |
| TxaTb1  | Thalassiothrix_antarctica_Strain_L6-D1 CAMPEP_0200980980  | 95,96       | Thalassiothrix antarctica Strain L6-D1                                  |
| TxaTb2  | Thalassiothrix_antarctica_Strain_L6-D1 CAMPEP_0200980982  |             | Thalassiothrix antarctica Strain L6-D1                                  |
| TdTb1a  | Triceratium_dubium_Strain_CCMP147 CAMPEP_0197435880       |             | Triceratium dubium Strain CCMP147                                       |
| TdTb2   | Triceratium_dubium_Strain_CCMP147 CAMPEP_0197443726       |             | Triceratium dubium Strain CCMP147                                       |
| TdTb1b  | Triceratium_dubium_Strain_CCMP147 CAMPEP_0197468100       | 77,08-89,46 | Triceratium dubium Strain CCMP147                                       |
|         | <b>GENOME out group:</b>                                  |             |                                                                         |
| HsTbB6  | NP_001290453                                              |             | Homo sapiens                                                            |
| HsTbB   | NP_821133                                                 |             | Homo sapiens                                                            |
| HsTbB1  | NP_110400                                                 |             | Homo sapiens                                                            |
| HsTbB2A | NP_001060.1                                               |             | Homo sapiens                                                            |
| HsTbB3  | NP_006077                                                 |             | Homo sapiens                                                            |
| HsTbB4a | NP_001276052                                              |             | Homo sapiens                                                            |
| HsTb8B  | NP_817124.1                                               |             | Homo sapiens                                                            |
| HsTbB2B | NP_821080                                                 | 99.5        | Homo sapiens                                                            |
| HsTbB4B | NP_006079                                                 | 98.4        | Homo sapiens                                                            |
| AtTb1   | NP_177706.1                                               |             | Arabidopsis thaliana                                                    |
| AtTb2   | NP_568959.1                                               |             | Arabidopsis thaliana                                                    |
| AtTb4   | NP_199247.1                                               |             | Arabidopsis thaliana                                                    |
| AtTb5   | NP_564101.1                                               |             | Arabidopsis thaliana                                                    |
| AtTb6   | NP_196786.1                                               |             | Arabidopsis thaliana                                                    |
| AtTb7   | NP_180515.1                                               |             | Arabidopsis thaliana                                                    |
| AtTb8   | NP_001190373.1                                            |             | Arabidopsis thaliana                                                    |

|               |                                                                                    |      |                                                               |
|---------------|------------------------------------------------------------------------------------|------|---------------------------------------------------------------|
| AtTb9         | NP_193821.1                                                                        |      | <i>Arabidopsis thaliana</i>                                   |
| GAMMA TUBULIN |                                                                                    |      |                                                               |
|               | GENOME DIATOM                                                                      |      |                                                               |
| FcTg          | Fracy1 193621                                                                      |      | <i>Fragilariopsis cylindrus</i>                               |
| PmTg          | Psemu1 296046                                                                      |      | <i>Pseudo-nitzschia multiseriata</i>                          |
| PmtTg         | Psemulti_0095950                                                                   |      | <i>Pseudo-nitzschia multistriata</i>                          |
| PtTg1         | Phatr2 44225                                                                       |      | <i>Phaeodactylum tricornutum</i>                              |
| FrTg          | <i>Fragilaria radians</i>  19726                                                   |      | <i>Fragilaria radians</i>                                     |
| TpTg          | Thaps3 29237                                                                       |      | <i>Thalassiosira pseudonana</i>                               |
|               | TRANSCRIPTOME DIATOM                                                               |      |                                                               |
| AsTg          | <i>Amphiprora</i> -sp CAMPEP_0186484566                                            |      | <i>Amphiprora</i> sp. Ehrenberg                               |
| CafTg         | <i>Chaetoceros</i> -affinis-CCMP159 CAMPEP_0187035934                              |      | <i>Chaetoceros affinis</i> Lauder Strain CCMP159              |
| CdTg          | <i>Chaetoceros debilis</i> _Strain_MM31A-1 CAMPEP_0200887882                       |      | <i>Chaetoceros debilis</i> Strain MM31A-1                     |
| CnTg          | <i>Chaetoceros neogracile</i> _Strain_CCMP1317 CAMPEP_0200991790                   |      | <i>Chaetoceros neogracile</i> Strain CCMP1317                 |
| CsTg          | <i>Chaetoceros</i> _sp._Strain_GSL56 CAMPEP_0176501072                             |      | <i>Chaetoceros</i> sp. Strain GSL56                           |
| DfTg          | <i>Dactyliosolen fragilissimus</i>  CAMPEP_0184870234                              |      | <i>Dactyliosolen fragilissimus</i>                            |
| EsTg          | <i>Extubocellulus spinifer</i> _Strain_CCMP396 CAMPEP_0200485434                   |      | <i>Extubocellulus spinifer</i> Strain CCMP396                 |
| FksTg         | <i>Fragilariopsis kerguelensis</i> _Strain_L2-C3 CAMPEP_0199389192                 |      | <i>Fragilariopsis kerguelensis</i> Strain L2-C3               |
| LdsTg         | <i>Leptocylindrus danicus</i> _Strain_CCMP1856 CAMPEP_0196807940                   |      | <i>Leptocylindrus danicus</i> Strain CCMP1856                 |
| LdTg          | <i>Leptocylindrus danicus</i> _var._ <i>danicus</i> _Strain_B650 CAMPEP_0116005642 |      | <i>Leptocylindrus danicus</i> var. <i>danicus</i> Strain B650 |
| PdTg          | <i>Pseudo-nitzschia delicatissima</i> _Strain_B596 CAMPEP_0116108306               |      | <i>Pseudo-nitzschia delicatissima</i> Strain B596             |
| PpTg          | <i>Pseudo-nitzschia pungens</i> _Strain_cf._ <i>cingulata</i>  CAMPEP_0172375488   |      | <i>Pseudo-nitzschia pungens</i> Strain cf. <i>cingulata</i>   |
| SjTg          | <i>Skeletonema japonicum</i> _Strain_CCMP2506 CAMPEP_0201739406                    |      | <i>Skeletonema japonicum</i> Strain CCMP2506                  |
| TrgTg         | <i>Thalassiosira rotula</i> -GSO102 CAMPEP_0193020118                              |      | <i>Thalassiosira rotula</i> Strain GSO102                     |
| TrTg          | <i>Thalassiosira rotula</i> -CCMP3096 CAMPEP_0192947326                            |      | <i>Thalassiosira rotula</i> Strain CCMP3096                   |
| TwTg          | <i>Thalassiosira weissflogii</i> -CCMP1336 CAMPEP_0193065150                       |      | <i>Thalassiosira weissflogii</i> Strain CCMP1336              |
| TxaTg         | <i>Thalassiothrix antarctica</i> _Strain_L6-D1 CAMPEP_0200972590                   |      | <i>Thalassiothrix antarctica</i> Strain L6-D1                 |
|               | GENOME out group:                                                                  |      |                                                               |
| AtTg1         | NP_191724.1                                                                        |      | <i>Arabidopsis thaliana</i>                                   |
| AtTg2         | NP_196181.1                                                                        | 98.1 | <i>Arabidopsis thaliana</i>                                   |
| HsTg1         | NP_001061.2                                                                        |      | <i>Homo sapiens</i>                                           |



|       |           |      |                     |
|-------|-----------|------|---------------------|
| HsTg2 | NP_057521 | 97.7 | <i>Homo sapiens</i> |
|-------|-----------|------|---------------------|

## Reference

1. Majewska, R.; Ashworth, M.P.; Lazo-Wasem, E.; Robinson, N.J.; Rojas, L.; Van de Vijver, B.; Pinou, T. *Craspedostauros alatus* sp. nov., a new diatom (Bacillariophyta) species found on museum sea turtle specimens. *Diatom Res.* **2018**, *33*, 229–240.
