# Supplementary material for: Molecular Evolution of Tubulins in Diatoms
Source: MDPI journal article supplement (doi:10.3390/ijms23020618), 2022-01-06
Supplement: s1 [file s1]

Table S7a. Conservation in diatoms of the *H. sapiens*  $\alpha$ -tubulin post-translationally modified residues. Large taxa are highlighted in color: green – Coscinodiscophyceae; red – Mediophyceae; orange – Bacillariophyceae, Urneidophycidae; blue – Bacillariophyceae, Fragilariophycidae; purple – Bacillariophyceae, Bacillariophycidae.

| Posttranslational modification sites |             |                 |                 |                  |                |                   |      |                                                     |      |                 |      |
|--------------------------------------|-------------|-----------------|-----------------|------------------|----------------|-------------------|------|-----------------------------------------------------|------|-----------------|------|
| ID                                   | Acetylation | Detyrosination  | Phosphorylation | Ubiquitinylation | Palmitoylation | Polyglutamylation |      | Interacting residues<br>providing filament rigidity |      | Polyglycylation |      |
|                                      | K40         | C-terminal Y451 | Y432            | K304             | C376           | E443              | E445 | K60                                                 | H283 | E446            | E448 |
| HsTa1a                               | K           | Y               | Y               | K                | C              | E                 | E    | K                                                   | H    | E               | G    |
| Outgroup                             |             |                 |                 |                  |                |                   |      |                                                     |      |                 |      |
| TdTa2b                               | A           | Y               | Y               | A                | C              | E                 | E    | K                                                   | H    | D               | G    |
| TdTa2a                               | K           | E               | Y               | K                | C              | E                 | E    | K                                                   | H    | E               |      |
| PfTa1                                | K           | Y               | Y               | K                | C              |                   | E    | K                                                   | H    | E               | G    |
| Group $\alpha 1$                     |             |                 |                 |                  |                |                   |      |                                                     |      |                 |      |
| CbTa2                                | K           | Y               | Y               | K                | C              | E                 | E    | K                                                   | H    | E               | D    |
| DbTa1                                | K           | Y               | Y               | K                | C              | D                 | E    | K                                                   | H    | D               | D    |
| LdTa1a                               | K           | Y               | Y               | K                | C              | E                 | E    | K                                                   | H    | D               | D    |
| AusTa1a                              | K           | Y               | Y               | K                | C              | E                 | E    | K                                                   | H    | E               | D    |
| TdTa1                                | K           | T               | Y               | K                | C              | E                 | E    | K                                                   | H    | D               | D    |
| EaTa2                                | K           | Y               | Y               | K                | C              | E                 | E    | K                                                   | H    | D               | E    |
| PaTa2                                | K           | Y               | Y               | K                | C              |                   | E    | K                                                   | H    | D               | E    |
| TpTa                                 | K           | Y               | Y               | K                | C              |                   | E    | K                                                   | H    | D               | D    |
| CmTa                                 | K           | Y               | Y               | K                | C              | E                 | E    | K                                                   | H    | D               | D    |
| CnTa1a                               | K           | Y               | Y               | K                | C              | E                 | E    | K                                                   | H    | E               | D    |
| CdiTa1b                              | K           | Y               | Y               | K                | C              |                   | E    | K                                                   | H    | E               | E    |
| CpTa                                 | K           | Y               | Y               | K                | C              | E                 | E    | K                                                   | H    | D               | D    |
| ChTa                                 | K           | Y               | Y               | K                | C              | E                 | E    | K                                                   | H    | D               | D    |
| OdTa                                 | K           | Y               | Y               | K                | C              | E                 | E    | K                                                   | H    | D               | E    |
| OsTa                                 | K           | Y               | Y               | K                | C              | E                 | E    | K                                                   | H    | D               | E    |
| TaTa1                                | K           | Y               | Y               | K                | C              | E                 | E    | K                                                   | H    | D               | G    |
| TrTa                                 | G           | Y               | Y               | K                | C              | D                 | E    | K                                                   | H    | D               | G    |

|                                   |   |   |   |   |   |   |   |   |   |   |   |
|-----------------------------------|---|---|---|---|---|---|---|---|---|---|---|
| TpuTa                             | K | Y | Y | K | C | E | E | K | H | D | G |
| TaTa2                             | K | Y | Y | K | C | E | E | K | H | D | D |
| TmTa                              | K | Y | Y | K | C | E | E | K | H | D | D |
| ToTa                              | K | Y | Y | K | C | E | E | K | H | D | D |
| TpuTa2                            | K | Y | Y | K | C |   | E | K | H | D | D |
| TgTa                              | K | Y | Y | K | C | E | E | K | H | D | D |
| DcTa                              | d | Y | Y | K | C | E | E | K | H | D | D |
| SgTa                              | K | Y | Y | K | C | E | D | K | H | F | D |
| SjTa                              | K | Y | Y | K | C | E | E | K | H | F | D |
| SmeTa                             | K | Y | Y | K | C | E | D | K | H | D | D |
| SmaTa                             | K | Y | Y | K | C | E | E | K | H | D | D |
| SdTa                              | K | Y | Y | K | C | E | E | K | H | D | D |
| ScTa                              | K | Y | Y | K | C | E | E | K | H | D | D |
| Group $\alpha 2$                  |   |   |   |   |   |   |   |   |   |   |   |
| DbTa1a                            | G | Y | Y | K | C | D | G | D | H | E | E |
| AusTa1b                           | K | Y | Y | K | C | D | E | K | H | E | D |
| EsTa1a                            | G | Y | Y | K | C |   | E | K | H | E | E |
| EsTa1b                            | G | Y | Y | K | C | E | E | K | H | D | E |
| MpTa                              | G | Y | Y | K | C |   | E | K | H | D | D |
| Group $\alpha 3$ ( $\alpha 3.1$ ) |   |   |   |   |   |   |   |   |   |   |   |
| AtsTa                             | K | Y | Y | K | C | E | E | K | H | D | D |
| LdTa1b                            | R | Y | Y | K | C | E | D | K | H | F | E |
| LdsTa                             | R | Y | Y | K | C | E | E | K | H | F | E |
| Group $\alpha 3$ ( $\alpha 3.2$ ) |   |   |   |   |   |   |   |   |   |   |   |
| PaTa1                             | I | Y | Y | K | C | E | E | K | H | D | D |
| DfTa                              | K | Y | Y | K | C | A | D | K | H | E | G |
| DbTa2                             | P | Y | Y | K | C | E | I | K | H | D | E |
| EaTa1                             | K | Y | Y | K | C |   | Q | K | H | I | G |
| CdiTa2                            | K | Y | Y | K | C |   | G | K | H | E | D |
| AgTa1                             | I | Y | Y | K | C | D | G | Q | Y | E | D |

|                  |   |   |   |   |   |   |   |   |   |   |   |
|------------------|---|---|---|---|---|---|---|---|---|---|---|
| CbTa1            | I | Y | Y | K | C |   | L | K | H | E | D |
| CafTa            | I | Y | Y | K | C |   | L | K | H | E | E |
| CnTa1b           | I | Y | Y | K | C |   | G | K | H | D | D |
| Group $\alpha$ 4 |   |   |   |   |   |   |   |   |   |   |   |
| AgTa2            | N | Y | Y | K | C | E | D | K | H | D | D |
| LpTa             | S | Y | Y | K | C |   | E | K | H | D | D |
| TnTa2            | A | Y | Y | K | C | D | D | K | H | F | D |
| TnTa1            | N | Y | Y | K | C |   | D | K | H | E | D |
| TxaTa1           | G | Y | Y | K | C |   | G | K | H | Y | D |
| TxaTa2           | I | Y | Y | K | C |   | D | K | H | Y | D |
| FrTa             | D | Y | Y | K | C |   | D | G | H | D | E |
| SrTa2            | D | Y | Y | K | C |   | G | K | H | E | D |
| SrTa1            | V | Y | Y | K | C | G | G | K | H | E | D |
| Group $\alpha$ 5 |   |   |   |   |   |   |   |   |   |   |   |
| PtTa             | K | Y | Y | K | C |   | A | S | H | G | D |
| AcTa             | K | Y | Y | K | C |   | V | K | H | A | D |
| AsTa             | I | Y | Y | K | C | A | E | K | H | G | D |
| ApTa1            | I | Y | Y | K | C | A | E | K | H | G | D |
| ApTa3            | I | Y | Y | K | C | A |   | K | H | E | D |
| ApTa2            | I | Y | Y | K | C | A |   | K | H | D | D |
| ScsTa            | K | Y | Y | K | C | A | G | K | H | G | D |
| CauTa            | K | Y | Y | K | C |   | G | K | H | G | D |
| NpTa             | I | Y | Y | K | C |   | D | K | H | L |   |
| FcTa             | I | Y | Y | K | C |   | E | K | H | L |   |
| FkTa2            | S | Y | Y | K | C |   | E | K | H | A |   |
| NsTa             | K | Y | Y | K | C |   | E | K | H | L |   |
| FkTa1            |   | Y | Y | K | C |   | E | K | H | A |   |
| FksTa            |   | Y | Y | K | C | G | E | K | H | L |   |
| PfTa2            | E | Y | Y | K | C | E | A | Q | H | I |   |
| PhTa             | S | Y | Y | K | C |   | L | Q | H | I |   |

|       |   |   |   |   |   |   |   |   |   |   |   |
|-------|---|---|---|---|---|---|---|---|---|---|---|
| ParTa |   | Y | Y | K | C |   | G | M | H | E |   |
| PmTa2 | A | Y | Y | K | C |   | A | K | H | E | E |
| PmTa1 | A | Y | Y | K | C |   | V | K | H | E | E |
| PmtTa | D | Y | Y | K | C |   | G | K | H | T |   |
| PauTa | D | Y | Y | K | C | A | A | K | H | G |   |
| PpTa  | H | Y | Y | K | C |   | G | Q | H | I | Y |
| PdTa1 | N | Y | Y | K | C |   | Y | K | H | E | E |
| PdTa2 | N | Y | Y | K | C |   | Y | K | H | E | E |

Table S7b. Conservation in diatoms of the *H. sapiens*  $\beta$ -tubulin post-translationally modified residues. Large taxa are highlighted in color: green – Coscinodiscophyceae; red – Mediophyceae; blue – Bacillariophyceae, Fragilariophycidae; purple – Bacillariophyceae, Bacillariophycidae.

| Posttranslational modification sites |             |               |                 |                     |                                         |                     |                 |      |
|--------------------------------------|-------------|---------------|-----------------|---------------------|-----------------------------------------|---------------------|-----------------|------|
|                                      | Acetylation | Polyamination | Phosphorylation | Polyglutamylolation | Polyglutamylolation/<br>Polyglycylation | Polyglutamylolation | Polyglycylation |      |
| ID                                   | K252        | Q15           | S172            | E435                | E438                                    | E441                | E437            | E439 |
| HsTb1                                | K           | Q             | S               | E                   | E                                       | E                   | E               | T    |
| Outgroup                             |             |               |                 |                     |                                         |                     |                 |      |
| TdTb2                                | K           | Q             | S               | E                   | D                                       | D                   | E               | D    |
| ScTb1                                | K           | Q             | S               | E                   | D                                       | D                   | D               | E    |
| Group $\beta$ 1                      |             |               |                 |                     |                                         |                     |                 |      |
| PaTb2                                | K           | Q             | S               | E                   | D                                       | E                   | E               | D    |
| LdTb1                                | K           | Q             | S               | E                   | D                                       | E                   | E               | D    |
| LdaTb2                               | K           | Q             | S               | E                   | D                                       | E                   | E               | D    |
| SmeTb                                | K           | Q             | S               |                     |                                         |                     |                 |      |
| SgTb                                 | K           | Q             | S               | E                   | D                                       |                     | E               | D    |
| CdTb                                 | K           | Q             | S               | E                   | D                                       | D                   | E               | D    |
| CdTb2                                | K           | Q             | S               | E                   | D                                       | E                   | E               | D    |
| TpTb2                                | K           | Q             | S               | E                   | D                                       | E                   | E               | D    |
| CmTb2                                | K           | Q             | S               | E                   | D                                       | E                   | E               | D    |
| CwTb                                 | K           | Q             | S               | E                   | D                                       | E                   | E               | D    |
| TgTb2                                | K           | Q             | S               | E                   | D                                       | E                   | E               | D    |
| TrcTb2                               | K           | Q             | S               | E                   | D                                       | E                   | E               | D    |
| Group $\beta$ 2                      |             |               |                 |                     |                                         |                     |                 |      |
| DbTb                                 | K           | Q             | S               | G                   | E                                       | Y                   | D               | D    |
| MpTb                                 | K           | Q             | S               | E                   | D                                       | D                   | E               |      |
| EsTb                                 | K           | Q             | S               | E                   | G                                       | E                   | E               | G    |
| OsTb1a                               | K           | Q             | S               | E                   | E                                       | E                   | E               | E    |
| OsTb1b                               | K           | Q             | S               | E                   | E                                       | E                   | E               | E    |
| AusTb                                | K           | Q             | S               | E                   | E                                       | G                   | E               | E    |

|                 |   |   |   |   |   |   |   |   |
|-----------------|---|---|---|---|---|---|---|---|
| AtsTb           | K | Q | S | E | D | F | E | D |
| PaTb1           | K | Q | S | E | E | E | E | E |
| PiTb            | K | Q | S | E | E | E | E | E |
| ChTb            | K | Q | S | E | E | E | E | E |
| TdTb1b          | K | Q | S | D | G | D | E | E |
| OdTb1b          | K | Q | S | D | G | D | E | E |
| TdTb1a          | K | Q | S | D | G | E | E | E |
| OdTb1a          | K | Q | S | D | G | E | E | E |
| CpTb1           | K | Q | S | D | E | N | D | E |
| CpTb2           | K | Q | S | D | E | N | D | E |
| Group $\beta$ 3 |   |   |   |   |   |   |   |   |
| LdaTb1          | K | Q | S | D | D | E | D | D |
| LdsTb           | K | Q | S | E | E | E | E | E |
| LdTb            | K | Q | S | E | Q | E | D | E |
| TwTb            | K | Q | S | E | Q | E | E | Q |
| TwcTb           | K | Q | S | E | E | E | E | Q |
| CmTb1           | K | Q | S | D | Q | E | D | Q |
| TpTb1a          | K | Q | S | E | A | E |   |   |
| TpTb1b          | K | Q | S | L | T | N |   |   |
| TaTb            | K | Q | S | E | Q | E | E | Q |
| TmTb            | K | Q | S | E | Q | E | E | Q |
| ToTb            | K | Q | S | D | Y | E | D | Y |
| TgTb1           | K | Q | S | E | Q | E | E | Q |
| TrcTb1          | K | Q | S | E | E | E | E | E |
| TrTb            | K | Q | S |   | Q | E | E | Q |
| Group $\beta$ 4 |   |   |   |   |   |   |   |   |
| CaTb            | K | Q | S | E | E | D | E | E |
| CnTb            | K | Q | S | E | E | E | E | E |
| CsTb            | K | Q | S | E | E | E | E | E |
| CcTb            | K | Q | S | E | E | E | E | E |

|                 |   |   |   |   |   |   |   |   |
|-----------------|---|---|---|---|---|---|---|---|
| CdTb1           | K | Q | S | E | E | E | E | E |
| EaTb            | K | Q | S | E | E | E | E | E |
| DfTb            | K | Q | S | A | E | E | E | D |
| ScTb2           | K | Q | S | E | E | E | E | E |
| AgTb            | K | Q | S | E | D | E | E | D |
| Group $\beta$ 5 |   |   |   |   |   |   |   |   |
| FrTb            | K | Q | S | D | D | N | D | D |
| SrTb            | K | Q | S | D | A | D | D | A |
| TnTb            | K | Q | S | D | D | D | D | D |
| TxaTb1          | K | Q | S | E | D | D | E | D |
| TxaTb2          | K | Q | S | E | E | E | E | E |
| GoTb            | K | Q | S | E | D | E | E | D |
| ArTb            | K | Q | S | D | E | E | D | E |
| LpTb            | K | Q | S | D | D | D | D | D |
| Group $\beta$ 6 |   |   |   |   |   |   |   |   |
| PtTb            | K | Q | S | D | D | E | D | E |
| AcTb            | K | Q | S | D | E | G | D | D |
| ApTb            | K | Q | S | E | D | D | E | E |
| EmTb            | K | Q | S | D |   | E | D | D |
| PdTb2           | K | Q | S |   | D |   | F | E |
| PdTb1           | K | Q | S | D | D |   | D | D |
| PhTb1           | K | Q | S | D | D |   | D | D |
| PhTb2           | K | Q | S | T | D |   | T | D |
| NsTb            | K | Q | S | E | D | A | E | D |
| FcTb1           | K | Q | S | D | D | E | D | D |
| FcTb2           | K | Q | S | D | D | E | D | D |
| FkTb            | K | Q | S | D | D | D | D | D |
| FksTb           | K | Q | S | D | D | D | D | D |
| PfTb            | K | Q | S | D | D | D | D | D |
| PauTb           | K | Q | S | D | D | D | D | D |

|      |          |          |          |          |          |          |          |          |
|------|----------|----------|----------|----------|----------|----------|----------|----------|
| PmTb | <b>K</b> | <b>Q</b> | <b>S</b> | <b>D</b> | <b>D</b> | <b>Q</b> | <b>D</b> | <b>D</b> |
| PpTb | <b>K</b> | <b>Q</b> | <b>S</b> | <b>D</b> | <b>E</b> | <b>D</b> | <b>D</b> | <b>E</b> |



Table S7c. Conservation in diatoms of the *H. sapiens*  $\gamma$ -tubulin post-translationally modified residues. Large taxa are highlighted in color: red – Mediophyceae; blue – Bacillariophyceae, Fragilariophycidae; purple – Bacillariophyceae, Bacillariophycidae.

| SITE             | S80 | S131 | T288 | S361 |
|------------------|-----|------|------|------|
| HsTg1            | S   | S    | T    | S    |
| Group $\gamma$ 1 |     |      |      |      |
| LdTg             | G   | S    | T    | A    |
| LdsTg            | G   | S    | T    | A    |
| Group $\gamma$ 2 |     |      |      |      |
| DfTg             | G   | S    | T    | A    |
| CafTg            | S   | S    | T    | A    |
| CnTg             | S   | S    | T    | A    |
| CdTg             | G   | S    | T    | A    |
| CsTg             | G   | S    | T    | A    |
| Group $\gamma$ 3 |     |      |      |      |
| EsTg             | S   | S    | T    | A    |
| TwTg             | T   | S    | T    | A    |
| TpTg             | G   | S    | T    | A    |
| SjTg             | G   | S    | T    | A    |
| TrTg             | G   | S    | T    | A    |
| TrgTg            | G   | S    | T    | A    |
| Group $\gamma$ 4 |     |      |      |      |
| PtTg1            |     | S    | T    | A    |
| AsTg             |     | S    | T    | A    |
| TxaTg            | G   | S    | T    | A    |
| FrTg             | G   | S    | T    | A    |
| FcTg             | G   | S    | T    | A    |
| FksTg            | G   | S    | T    | A    |
| PdTg             | G   | S    | T    | A    |

|       |   |   |   |   |
|-------|---|---|---|---|
| PmTg  | G | S | T | A |
| PmtTg | G | S | T | A |
| PpTg  | G | S | T | A |
